# Supplementary material for: The FUS/circEZH2/KLF5/ feedback loop contributes to CXCR4-induced liver metastasis of breast cancer by enhancing epithelial-mesenchymal transition
Source: PubMed Central journal article supplement (PMC9555172; doi:10.1186/s12943-022-01653-2), 2022-10-12
Supplement: 12943_2022_1653_MOESM1_ESM.pdf [file 12943_2022_1653_MOESM1_ESM.pdf]

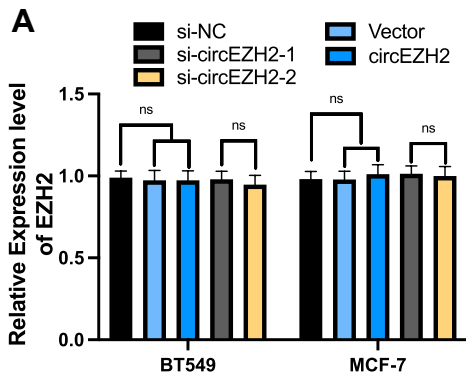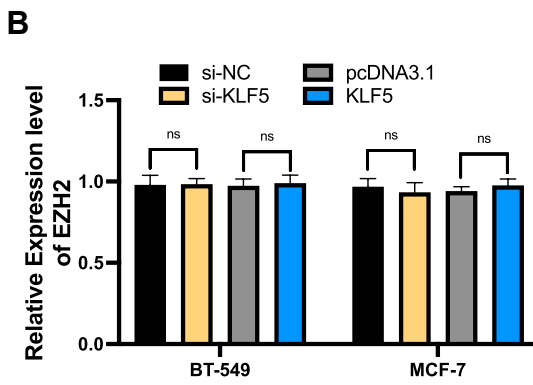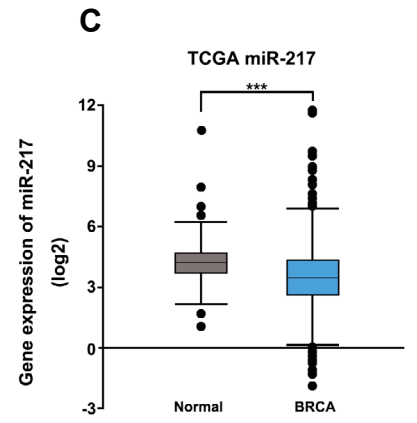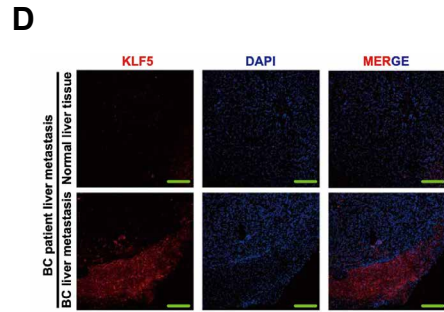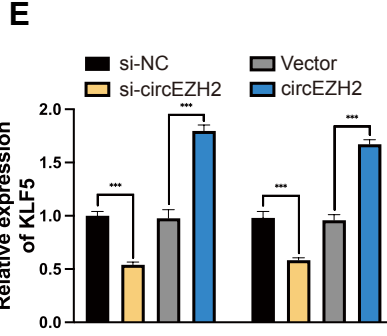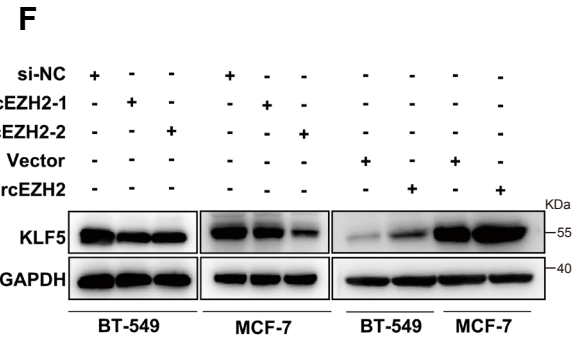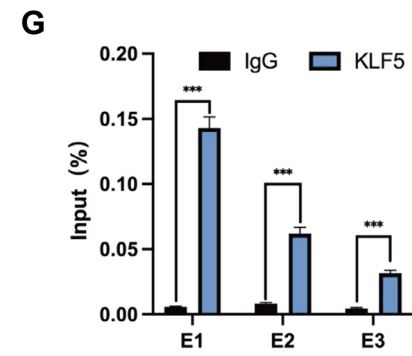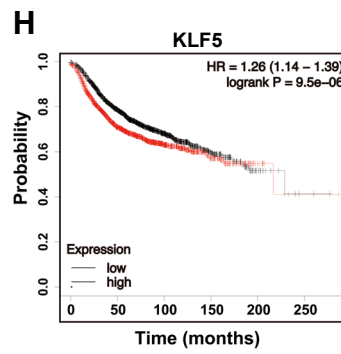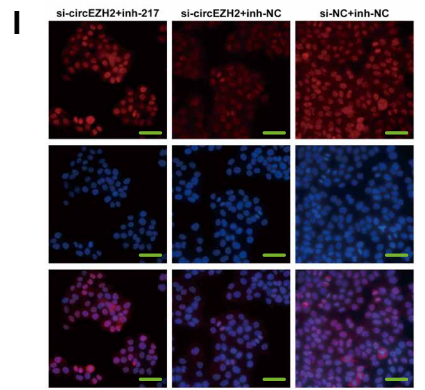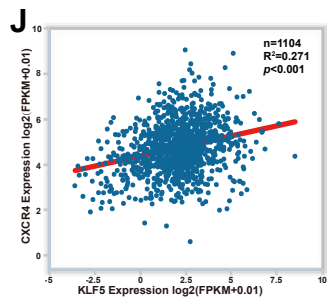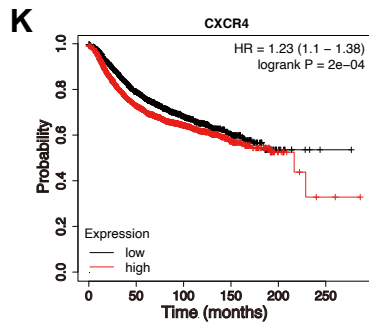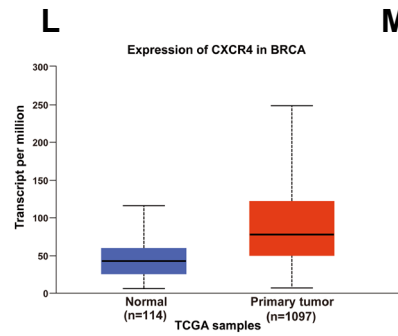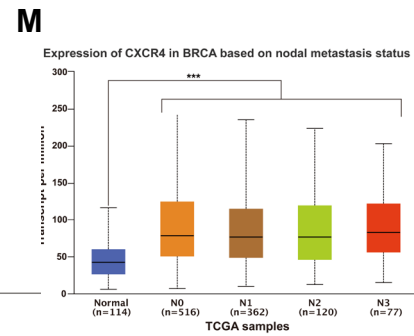

**a** RT-qPCR was performed to determine the expression change of EZH2 after overexpression or knockdown of circEZH2.

**b** After overexpression or knockdown of KLF5, the expression of EZH2 identified by RT-qPCR.

**c** TCGA database analysis showed that miR-217 was downregulated in BRCA samples compared with normal tissues.

**d** Immunofluorescence of liver metastasis slide from human BC patient was conducted to explore the expression of KLF5 on metastases compared with its adjacent normal liver tissue (Scale Bar 200 $\mu$ m).

**e-f** RT-qPCR and Western blot were performed to determine the expression of KLF5 after overexpression or knockdown of circEZH2 in RNA or protein level.

**g** ChIP assays were performed to find KLF5 enrichment efficiency of E1, E2, and E3 regions..

**h** High expression of KLF5 indicated with poor prognosis in BRCA patients according to TCGA database.

**i** IF was performed to showed that miR-217-5p inhibitor could reserves downregulation of KLF5 induced via circEZH2 (Scale bar 20 $\mu$ m).

**j** STARBASE correlation analysis showed that CXCR4 was positive correlated with KLF5 transcript.

**k** High expression of CXCR4 was related with poor prognosis in BRCA patients according to TCGA database.

**l-m** TCGA database showed that CXCR4 was upregulated in Primary tumor compared with normal tissues while CXCR4 was upregulated in different stages of BC compared to normal stage.

The data are showed as the mean  $\pm$  SD and all experiments were repeated at least three times, ns no significant, \*P < 0.05 \*\*P < 0.01, \*\*\*P < 0.001
